# Supplementary material
Source: MDPI journal article supplement (https://www.mdpi.com/2073-4352/13/9/1407)
Supplement: s1 [file s1 › crystals-2621696-supplementary.pdf]

**Supporting Information for**

**Synthesis and Crystal Structure of  
dimethyl{N-[(2-oxy-1-naphthyl)methylene]leucinato}silicon**

Uwe Böhme\*, Sabine Fels

Institut für Anorganische Chemie, Technische Universität Bergakademie Freiberg, Leipziger Str.  
29, 09599 Freiberg, Germany

\* Corresponding author: [uwe.boehme@chemie.tu-freiberg.de](mailto:uwe.boehme@chemie.tu-freiberg.de)

**Contents:**

Figure S1: Powder XRD

Figure S2:  $^1\text{H}$  and  $^{13}\text{C}$  NMR spectra of the ligand N-(2-hydroxy-1-naphthylidene)leucine

Figure S3:  $^1\text{H}$  and  $^{13}\text{C}$  NMR spectra of **1**

Figure S4:  $^{29}\text{Si}$  NMR spectra of **1**

Figure S5: IR Spectra

Figure S6: UV-Vis spectra

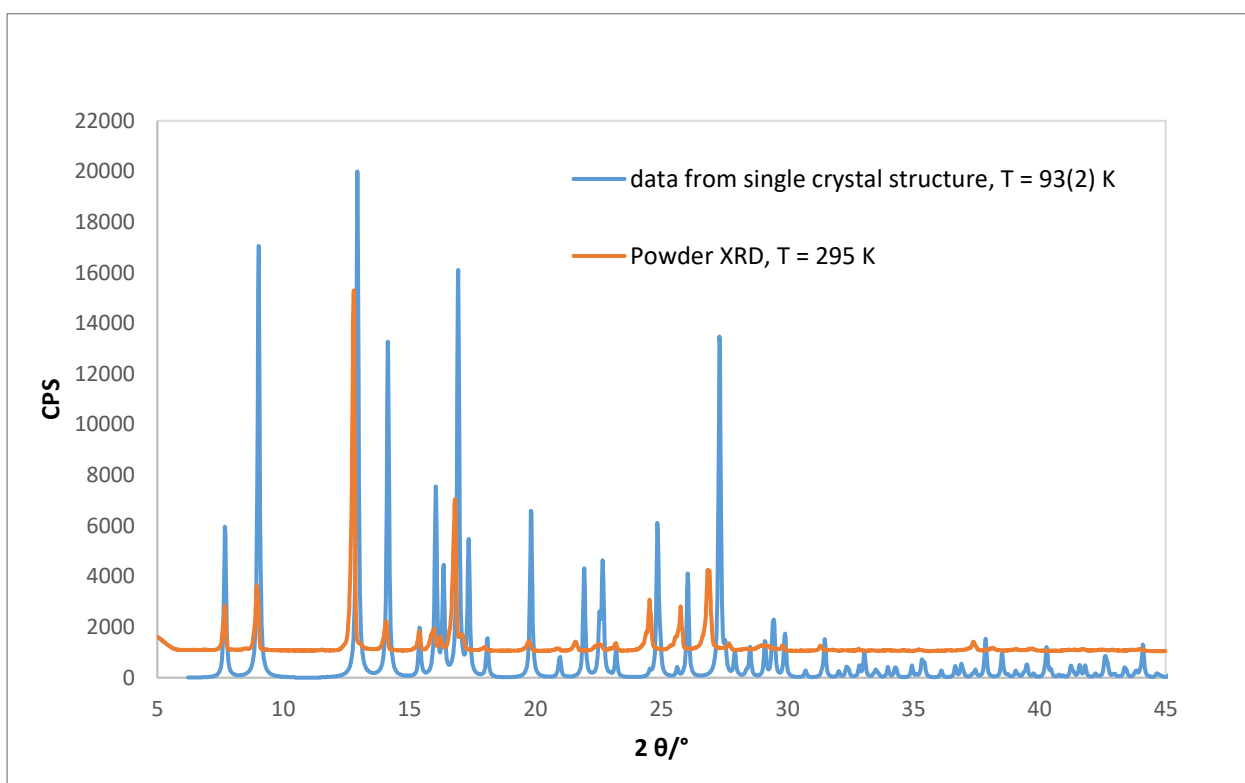

Figure S1: Powder XRD of the batch product of **1** measured at 295 K (orange line) and powder XRD generated from the single crystal structure measured at 93 K (blue line). The powder diffractogram was recorded on the X-ray diffractometer D2 PHASER from Bruker.

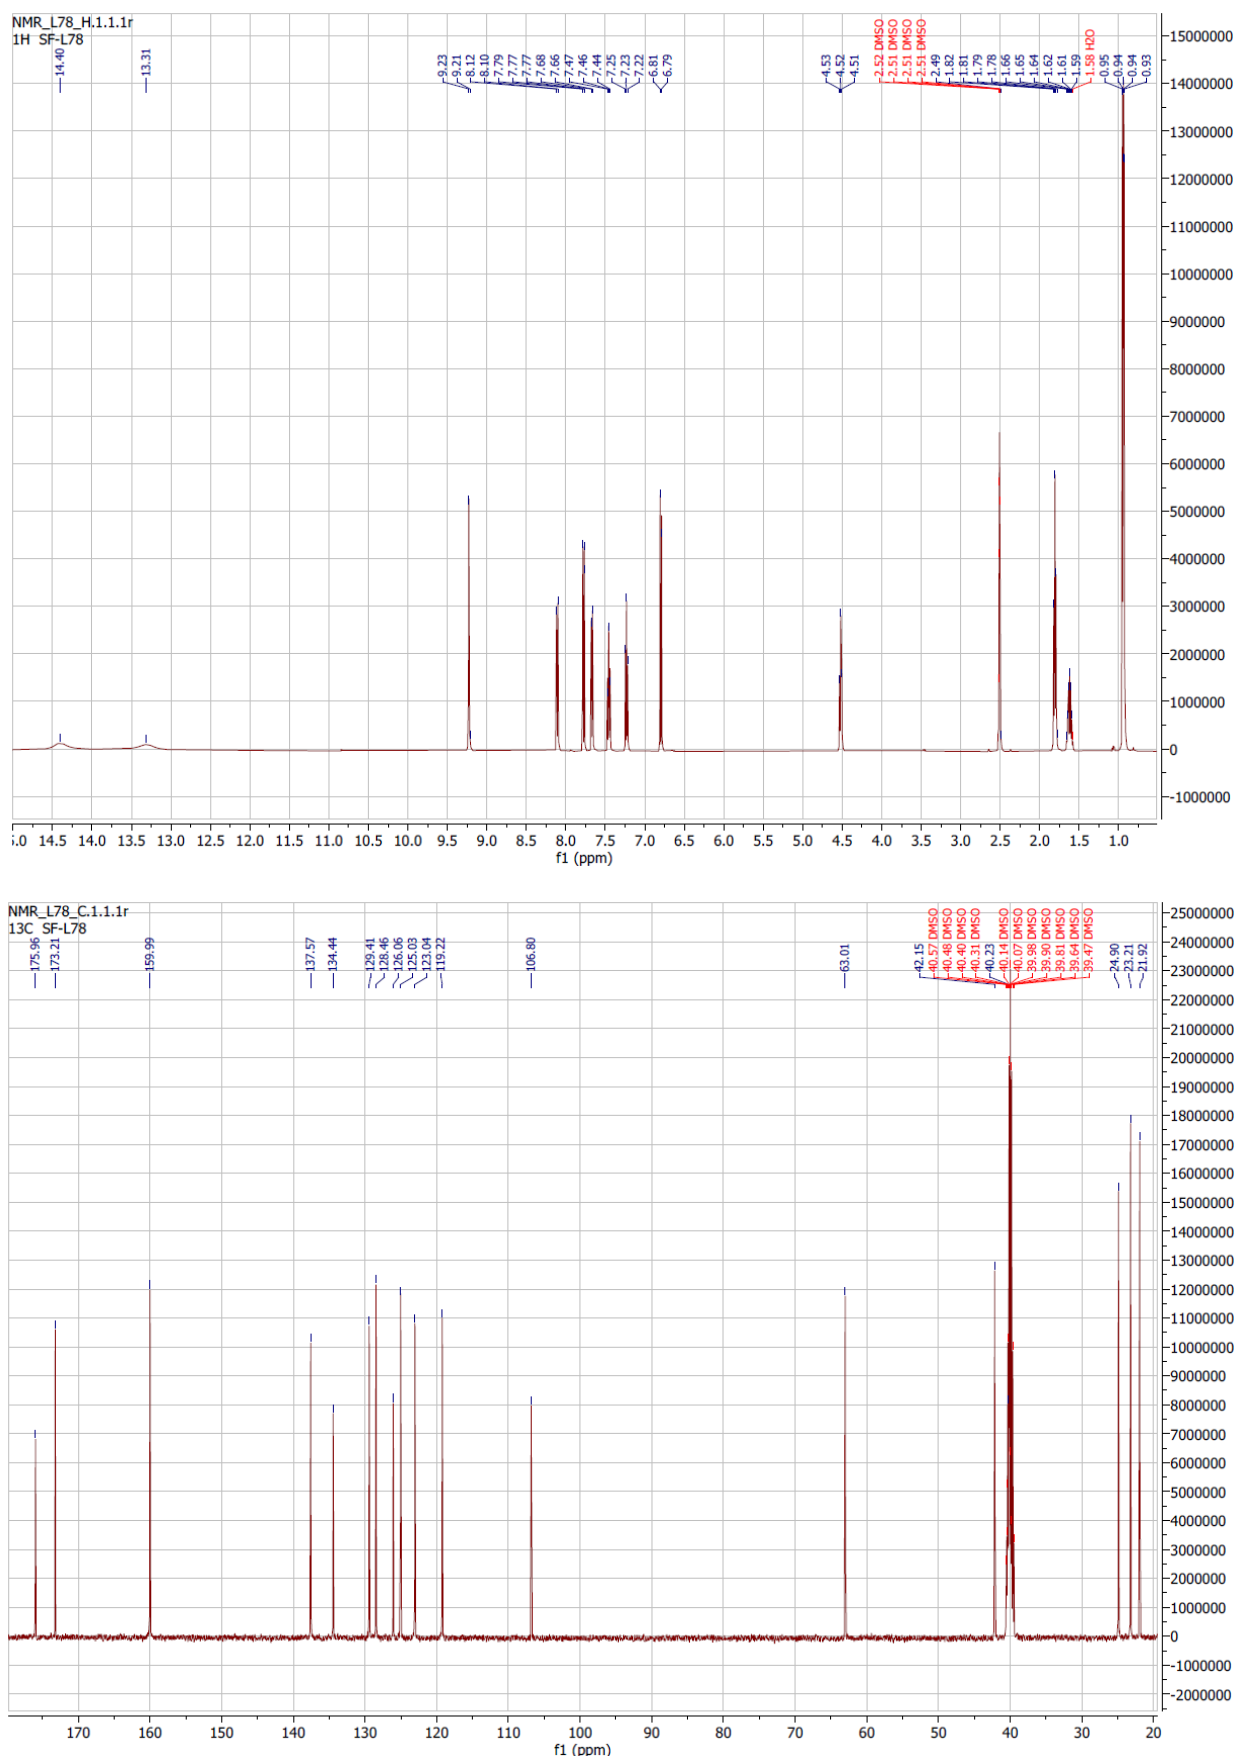

Figure S2: <sup>1</sup>H (top) and <sup>13</sup>C NMR spectra (bottom) of the ligand N-(2-hydroxy-1-naphthylidene)leucine

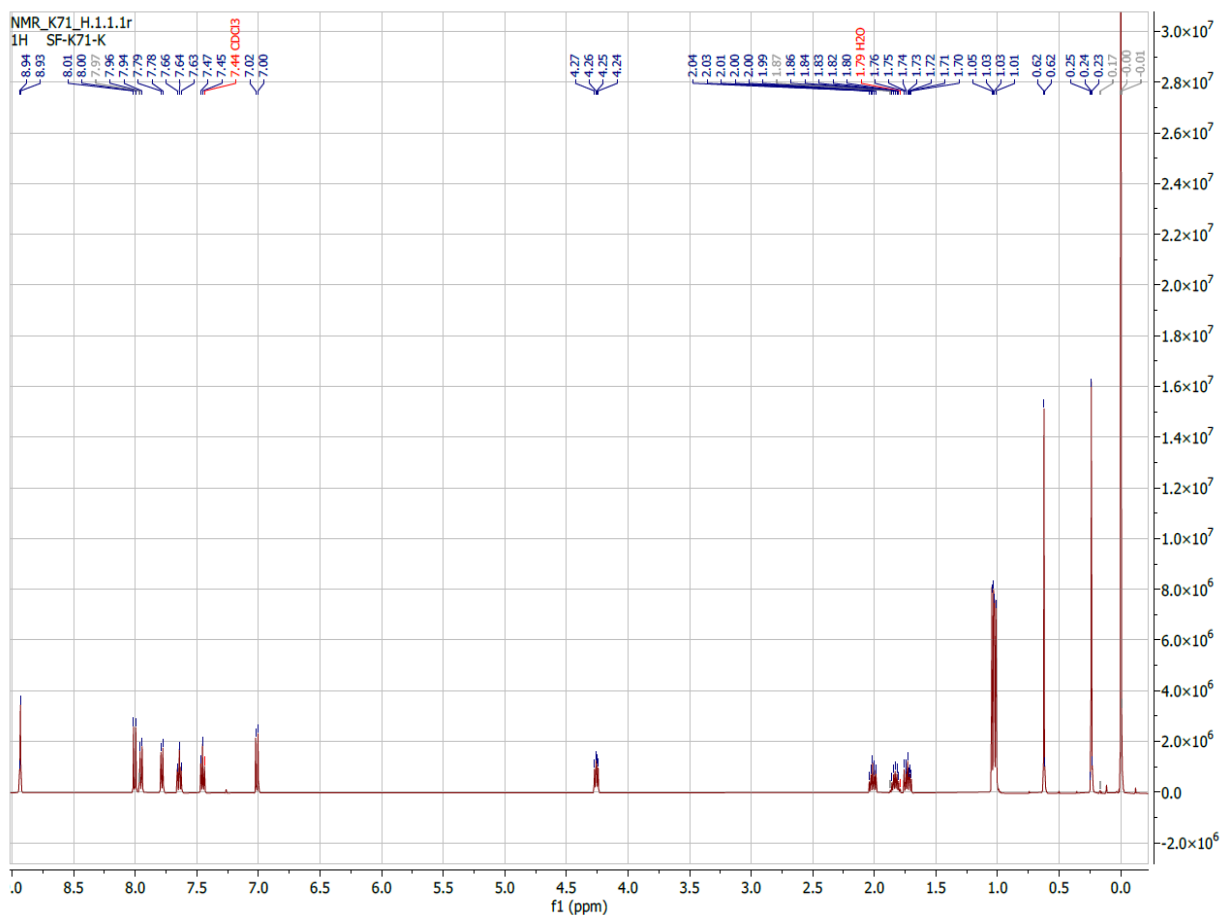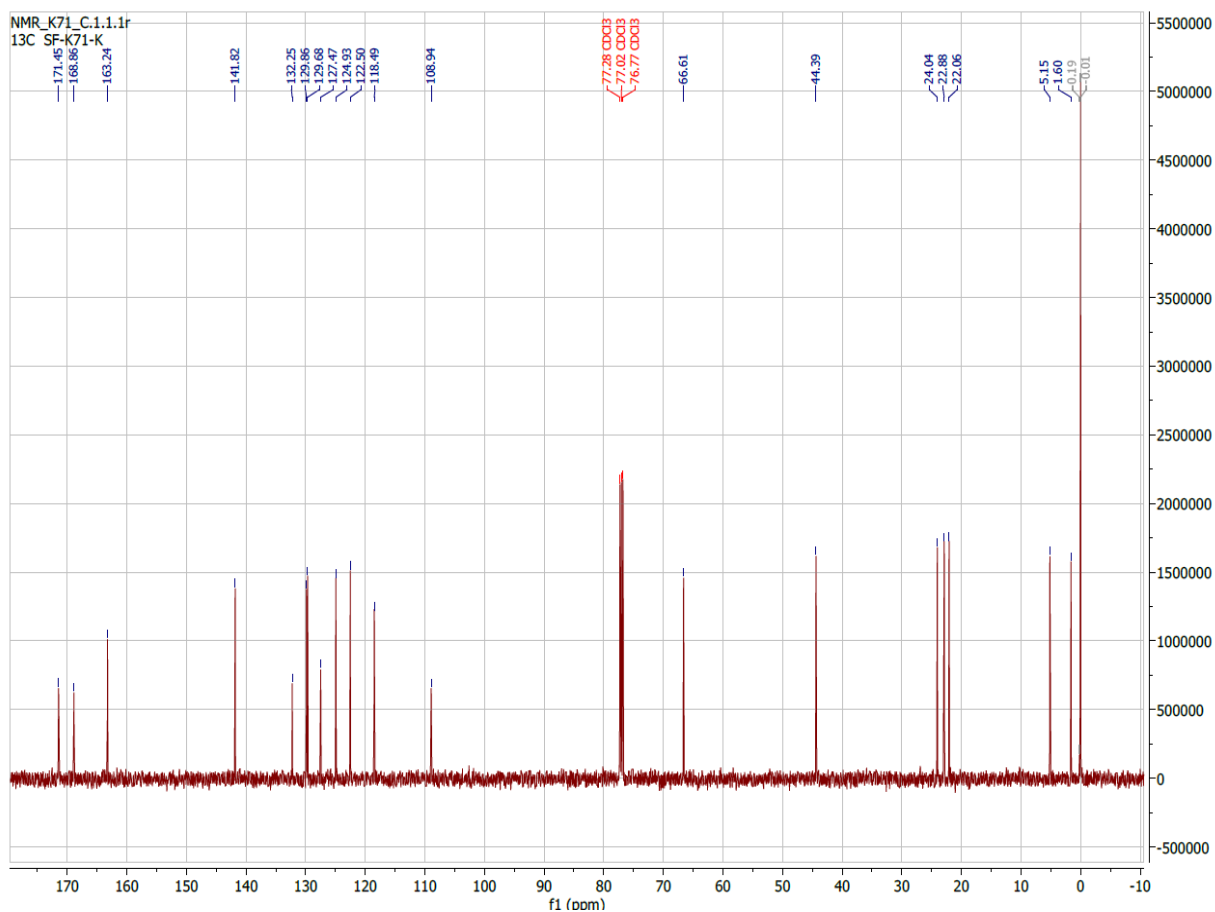

Figure S3: <sup>1</sup>H (top) and <sup>13</sup>C NMR spectra (bottom) of **1**

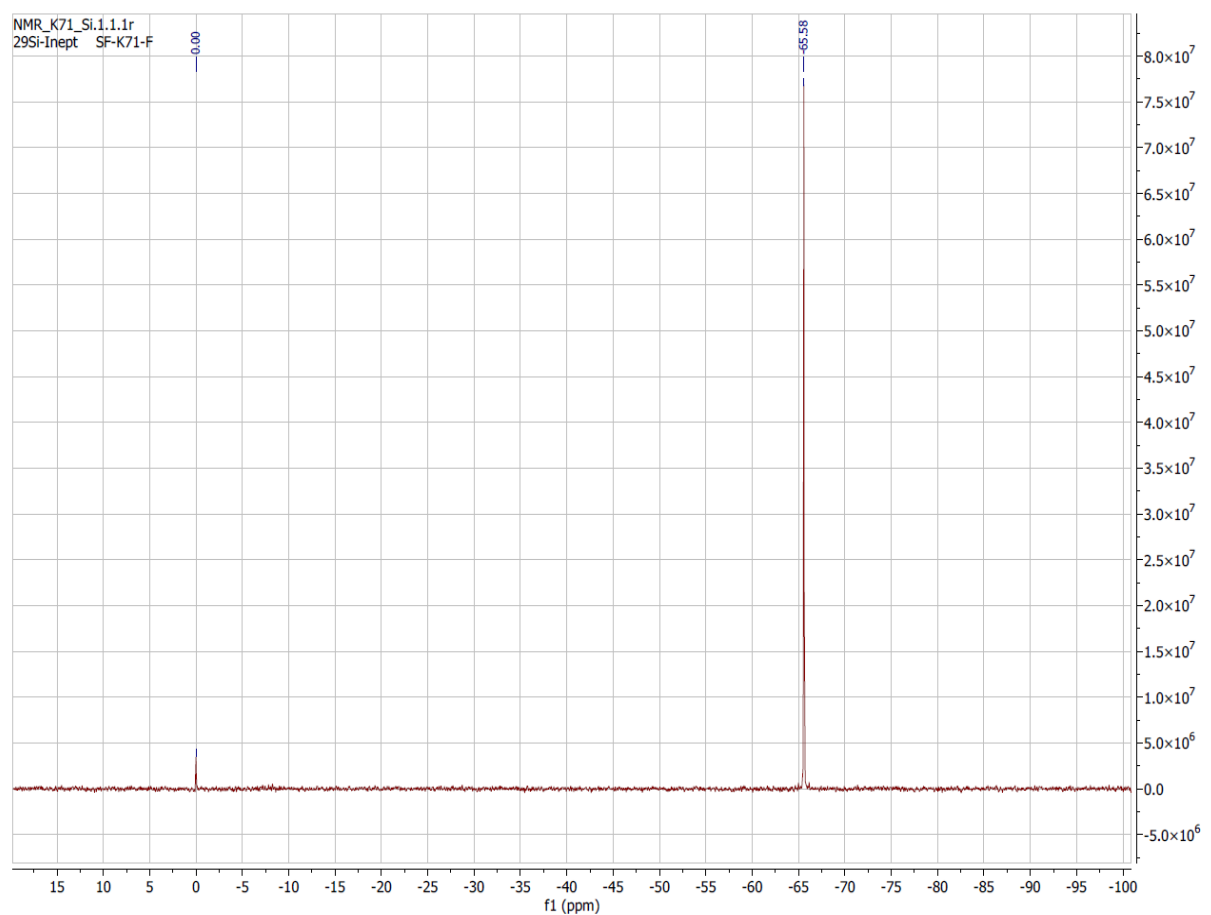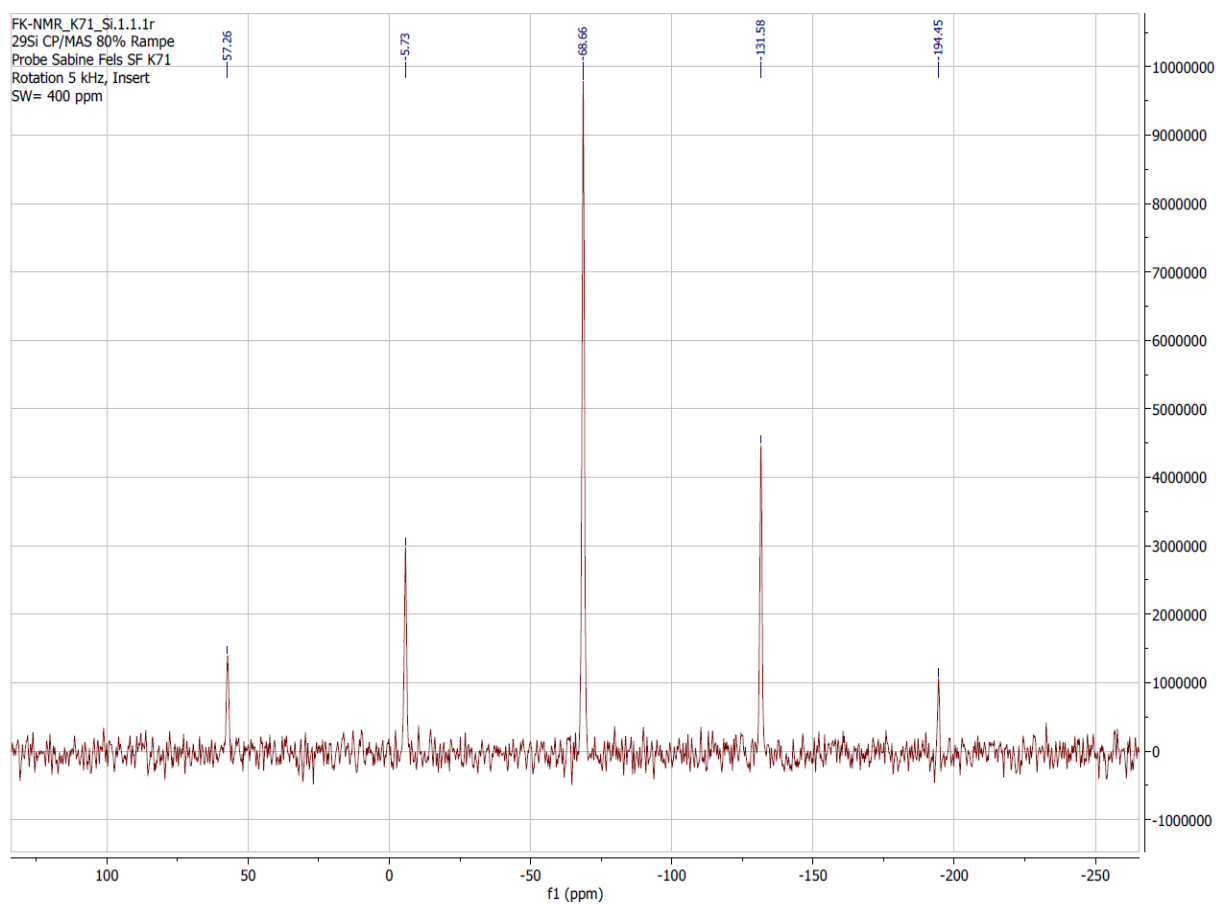

Figure S4:  $^{29}\text{Si}$  NMR spectra in solution (top) and in solid state (bottom) of **1**

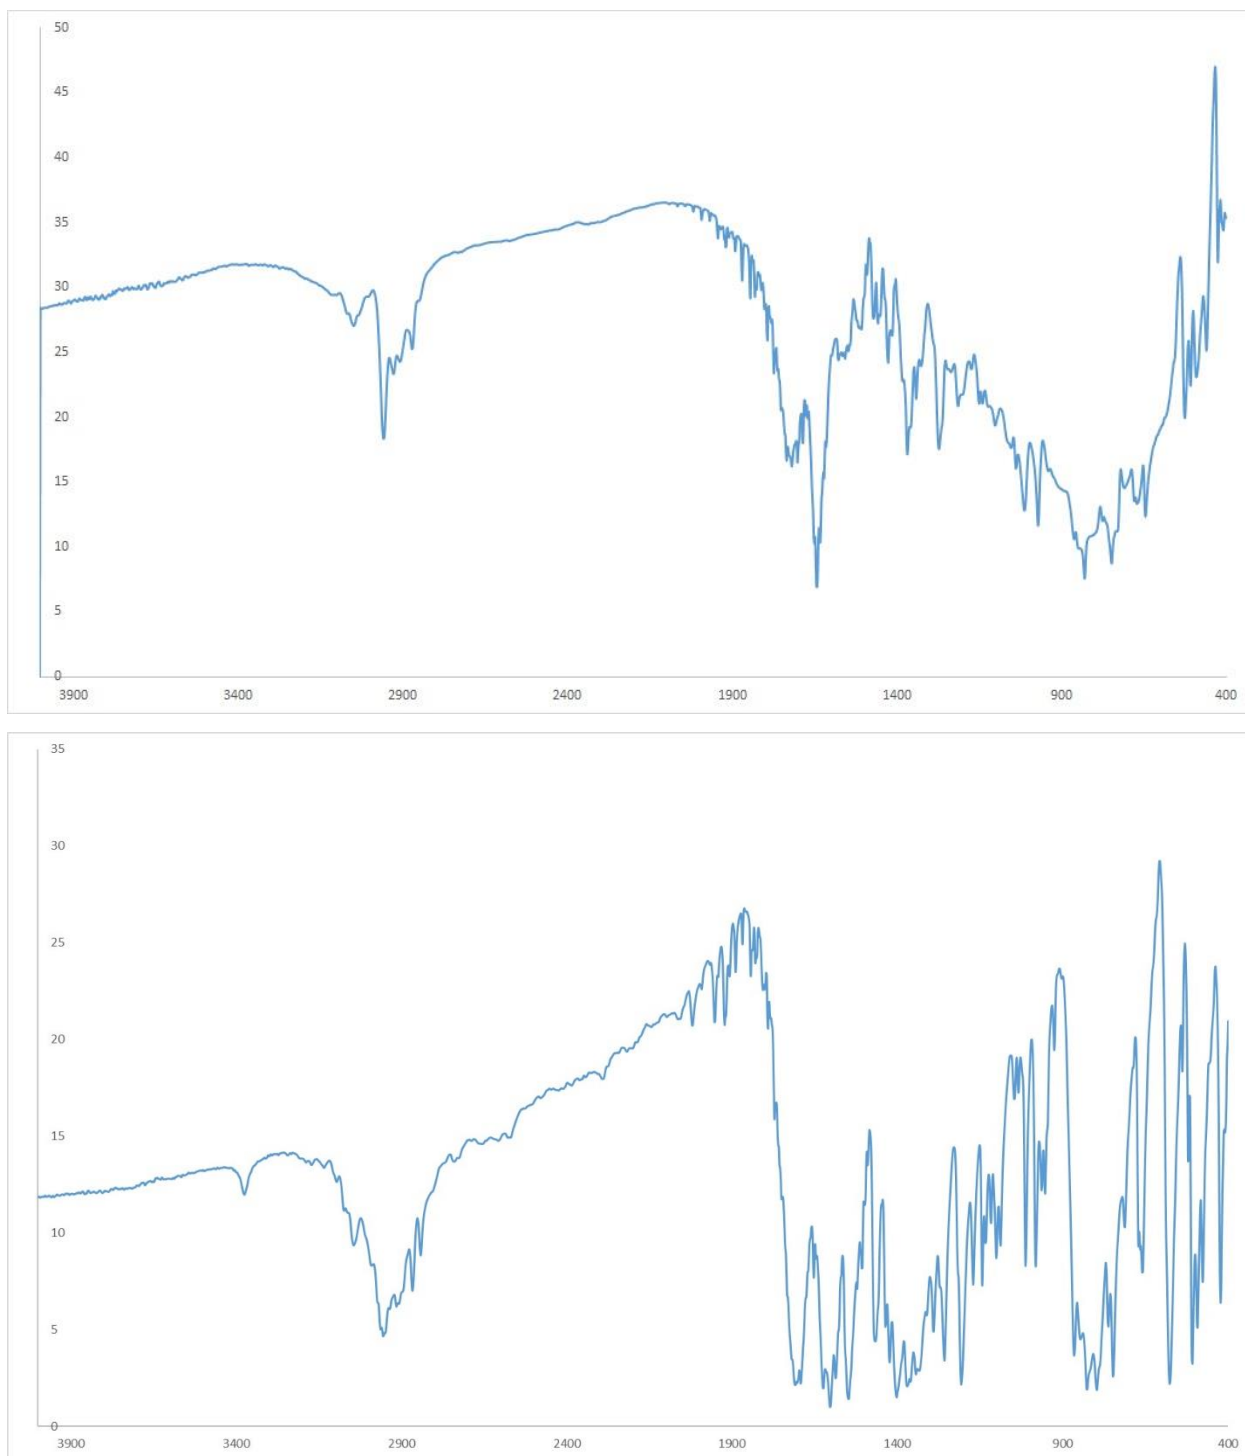

Figure S5: IR Spectra of ligand (top) and of complex **1** (bottom)

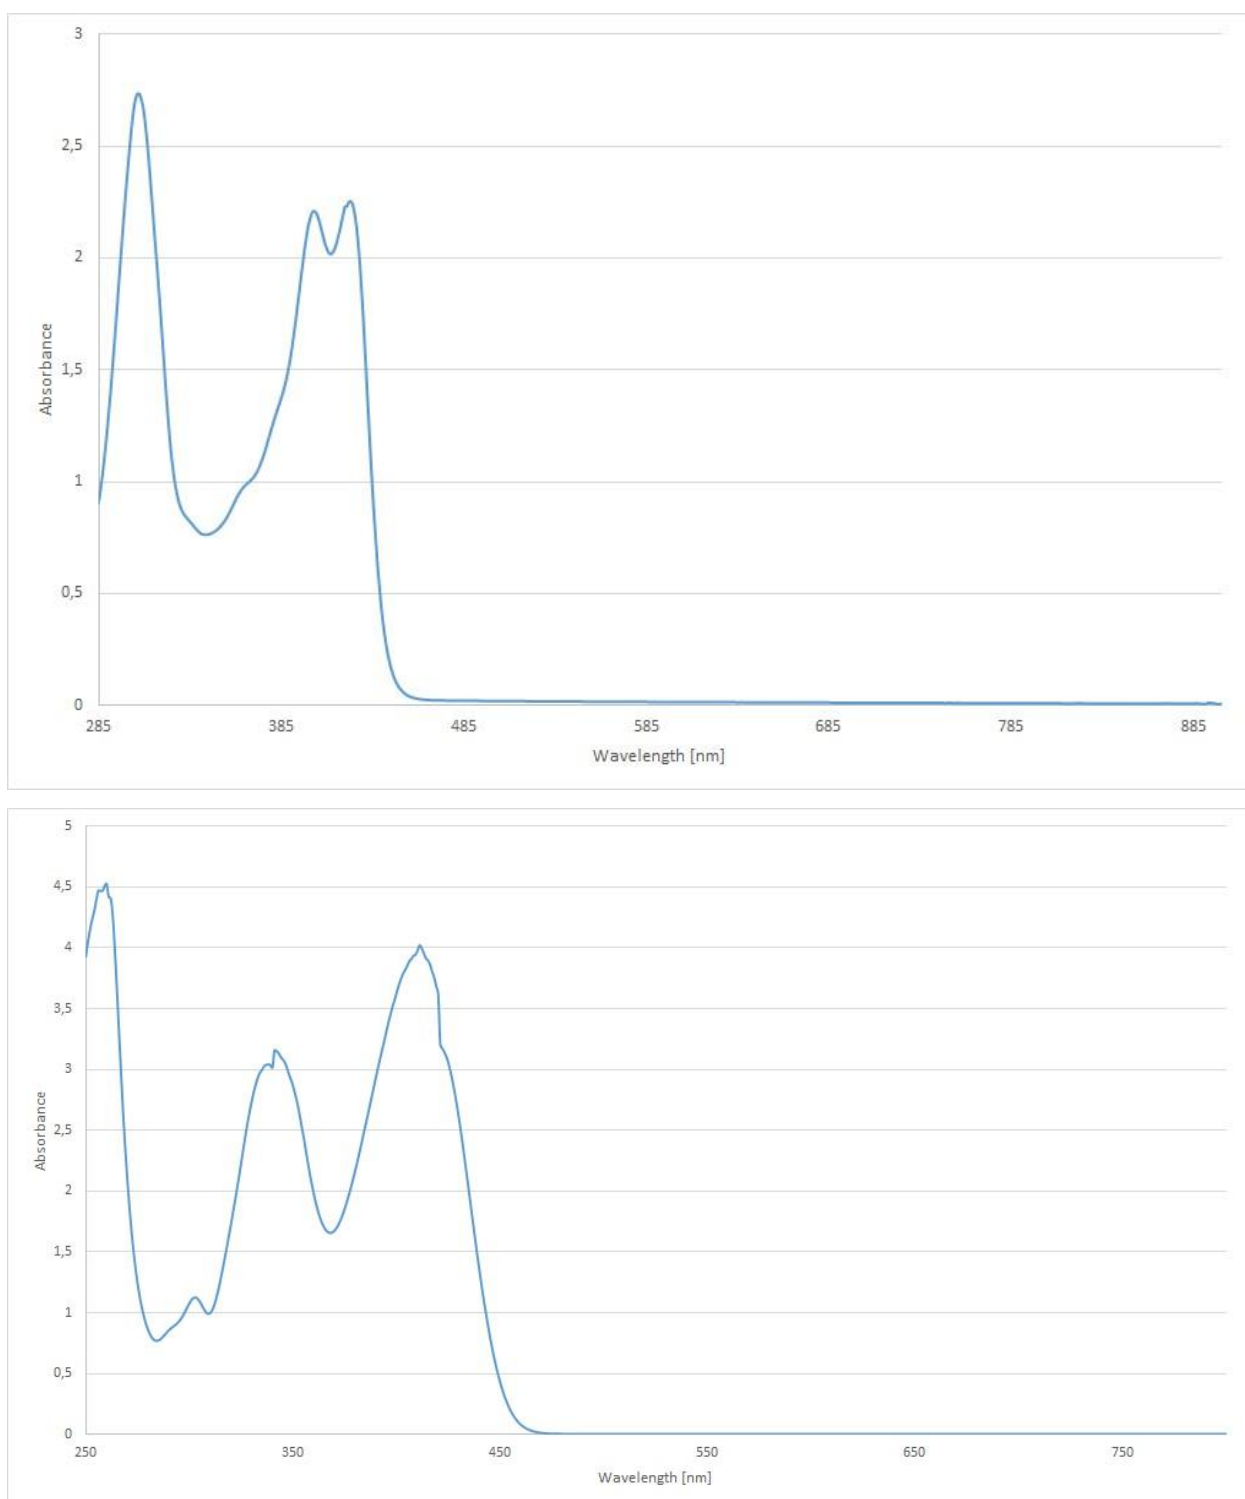

Figure S6: UV-Vis spectra of ligand (top) and of complex **1** (bottom)
